# Supplementary material for: Iso-oriented monolayer α-MoO3(010) films epitaxially grown on SrTiO3(001)
Source: Royal Society of Chemistry journal article supplement (doi:10.1039/c5nr07745a), 2016-01-01
Supplement: c5nr07745a1.pdf [file c5nr07745a1.pdf]

## Iso-oriented monolayer $\alpha$ - $\text{MoO}_3(010)$ films epitaxially grown on $\text{SrTiO}_3(001)$

Yingge Du,<sup>a</sup> Guoqiang Li,<sup>b,c</sup> Erik W. Peterson,<sup>d</sup> Jing Zhou,<sup>d</sup> Xin Zhang,<sup>b</sup> Rentao Mu,<sup>b</sup> Zdenek Dohnálek,<sup>b</sup> Mark Bowden,<sup>a</sup> Igor Lyubinetsky,<sup>a</sup> and Scott A. Chambers<sup>b</sup>

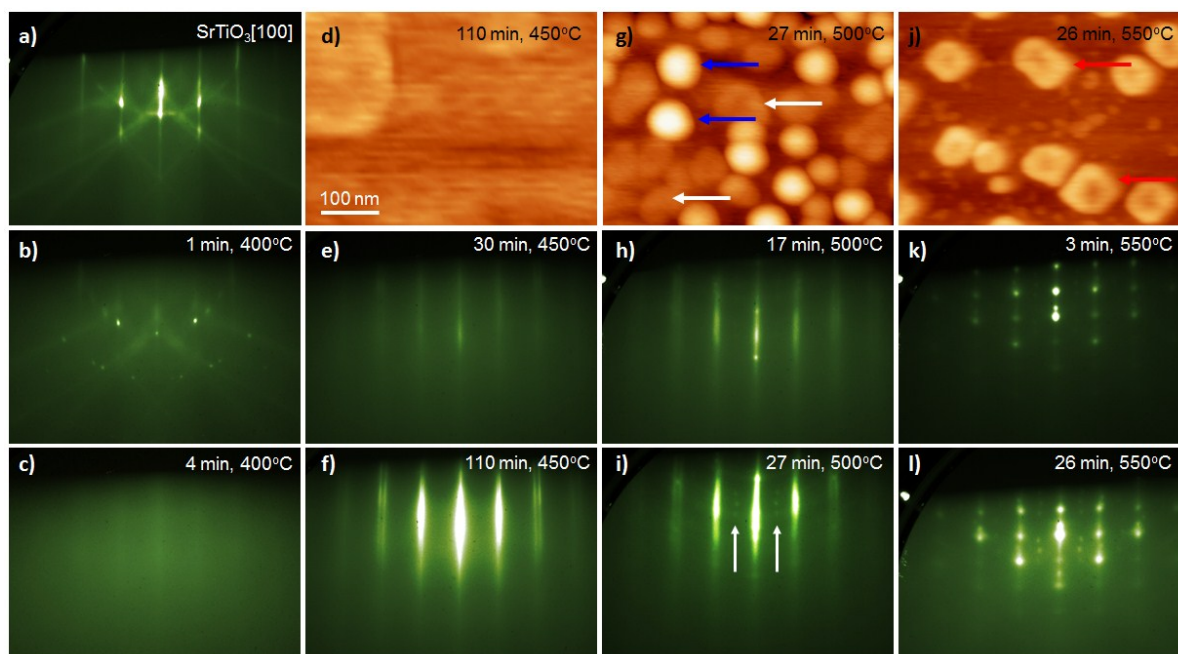

Figure s1: RHEED patterns taken along [100] azimuthal direction and AFM images (d, g, and j) of  $\text{MoO}_3$  films grown on  $\text{SrTiO}_3(001)$ . Total deposition time and substrate temperature for each film are marked.

<sup>a</sup> Environmental Molecular Sciences Laboratory, Pacific Northwest National Laboratory, Richland, WA, 99352 USA Email: Yingge.Du@pnl.gov

<sup>b</sup> Physical and Computational Sciences Directorate, Pacific Northwest National Laboratory, Richland, WA, 99352 USA

<sup>c</sup> Key Laboratory of Photovoltaic Materials of Henan Province, School of Physics & Electronics, Henan University, Kaifeng, 475004 P.R. China

<sup>d</sup> Department of Chemistry, University of Wyoming, Laramie, WY 82072 USA

† Electronic Supplementary Information (ESI) available: See

DOI: 10.1039/x0xx00000x
